# Supplementary material for: Ethnogeographic and inter-individual variability of human ABC transporters
Source: PubMed Central journal article supplement (PMC7170817; doi:10.1007/s00439-020-02150-6), 2020-03-23

# Supplementary Figure 1

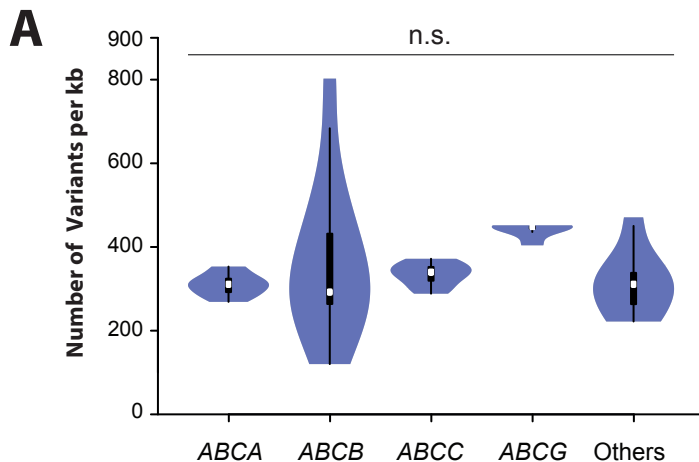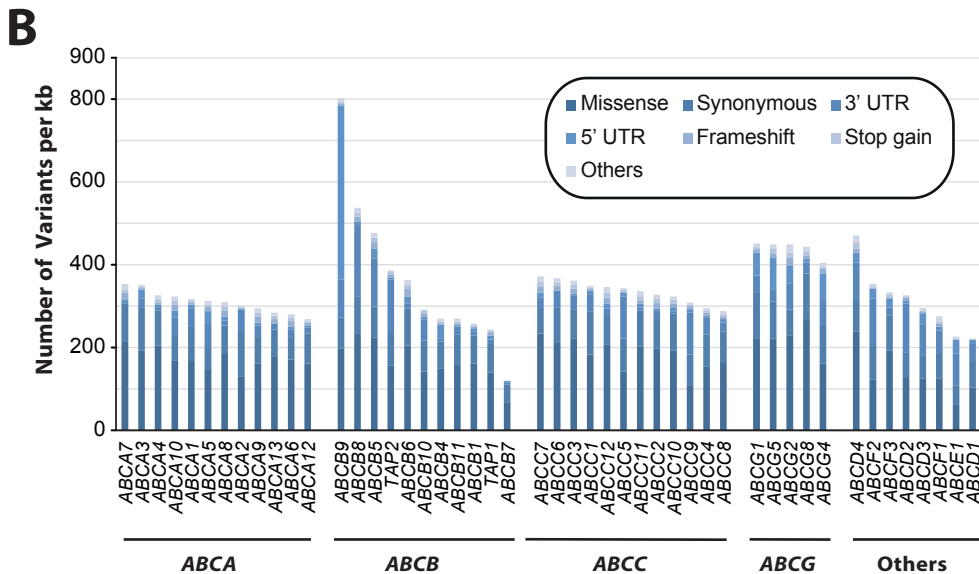

Supplement: 439_2020_2150_MOESM1_ESM.pdf [file 439_2020_2150_MOESM1_ESM.pdf]
