# Supplementary material for: Ethnogeographic and inter-individual variability of human ABC transporters
Source: PubMed Central journal article supplement (PMC7170817; doi:10.1007/s00439-020-02150-6), 2020-03-23

# Supplementary Figure 4

**A**

*ABCB1*

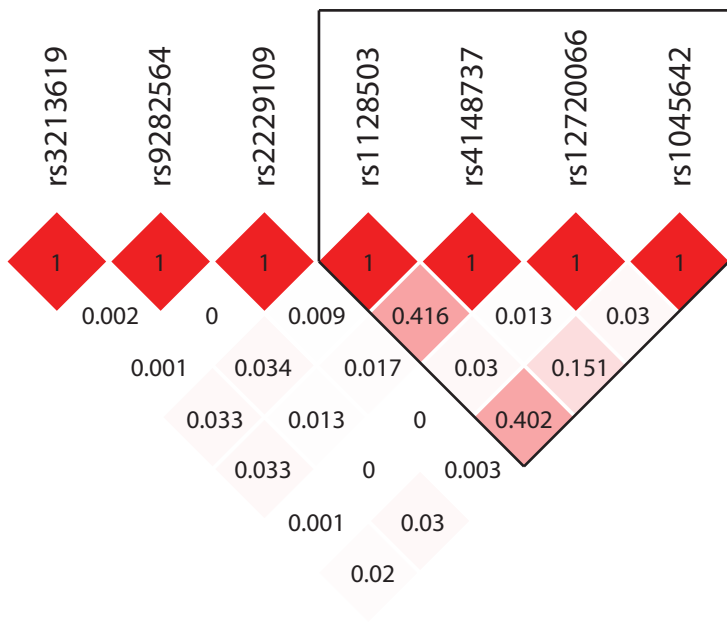

**B**

*ABCC1*

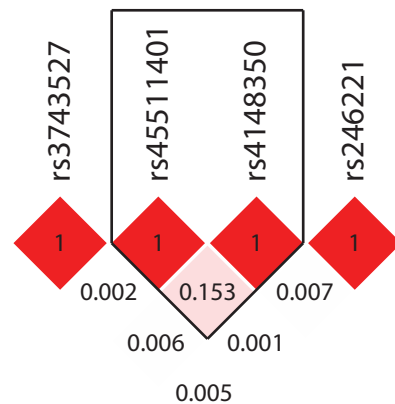

**C**

*ABCG2*

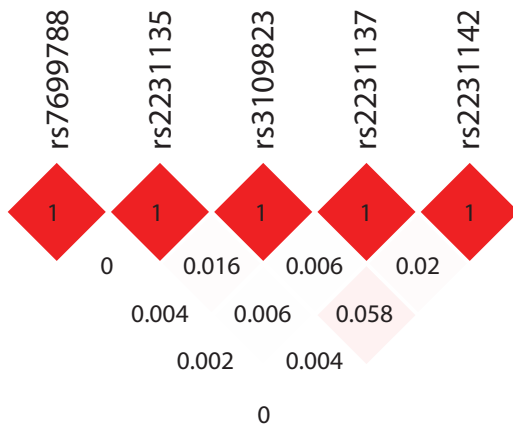

**R<sup>2</sup>:**

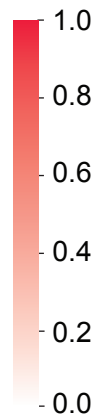

Supplement: 439_2020_2150_MOESM4_ESM.pdf [file 439_2020_2150_MOESM4_ESM.pdf]
